# Supplementary material
Source: Springer Nature journal article supplement (https://www.springermedizin.de/resource/supplementary/13002_2009_180_MOESM2_ESM.pdf/9627398)
Supplement: MOESM2 [file 9627398]

# Ethnopedological Soil Survey

Interviews

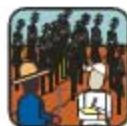

Profile Descriptions with Farmers

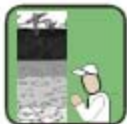

Workshop

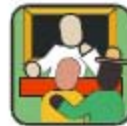

Systematization

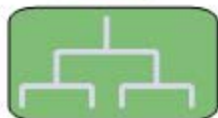

# Analysis of Literature

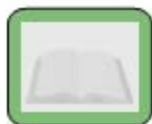

(Perez 1986; Pool 1985; Duch 1986, 1992, 1997, 2005; Dunning 1992, 2004; Beach 1998; Estrada 2000, 2004; Bautista et al 2003a, 2004, 2005abc; Barrera and Zinck 2000, 2003; Barrera y Toledo 2005; Jeansen et al 2007; and Sweetwood 2008)

# Techniques of Soil Survey

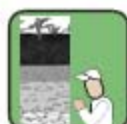

Site Selection

Profile Descriptions

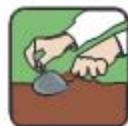

Sampling

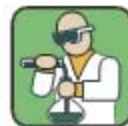

Laboratory Analyses

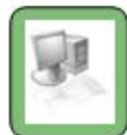

Soil Database

↓  
**Empirical Comparison**
